# Supplementary material
Source: publisher figshare collection journal article supplement (https://acs.figshare.com/ndownloader/files/5823258)
Supplement: Supplementary file 1 [file 5823258]

Supporting Information

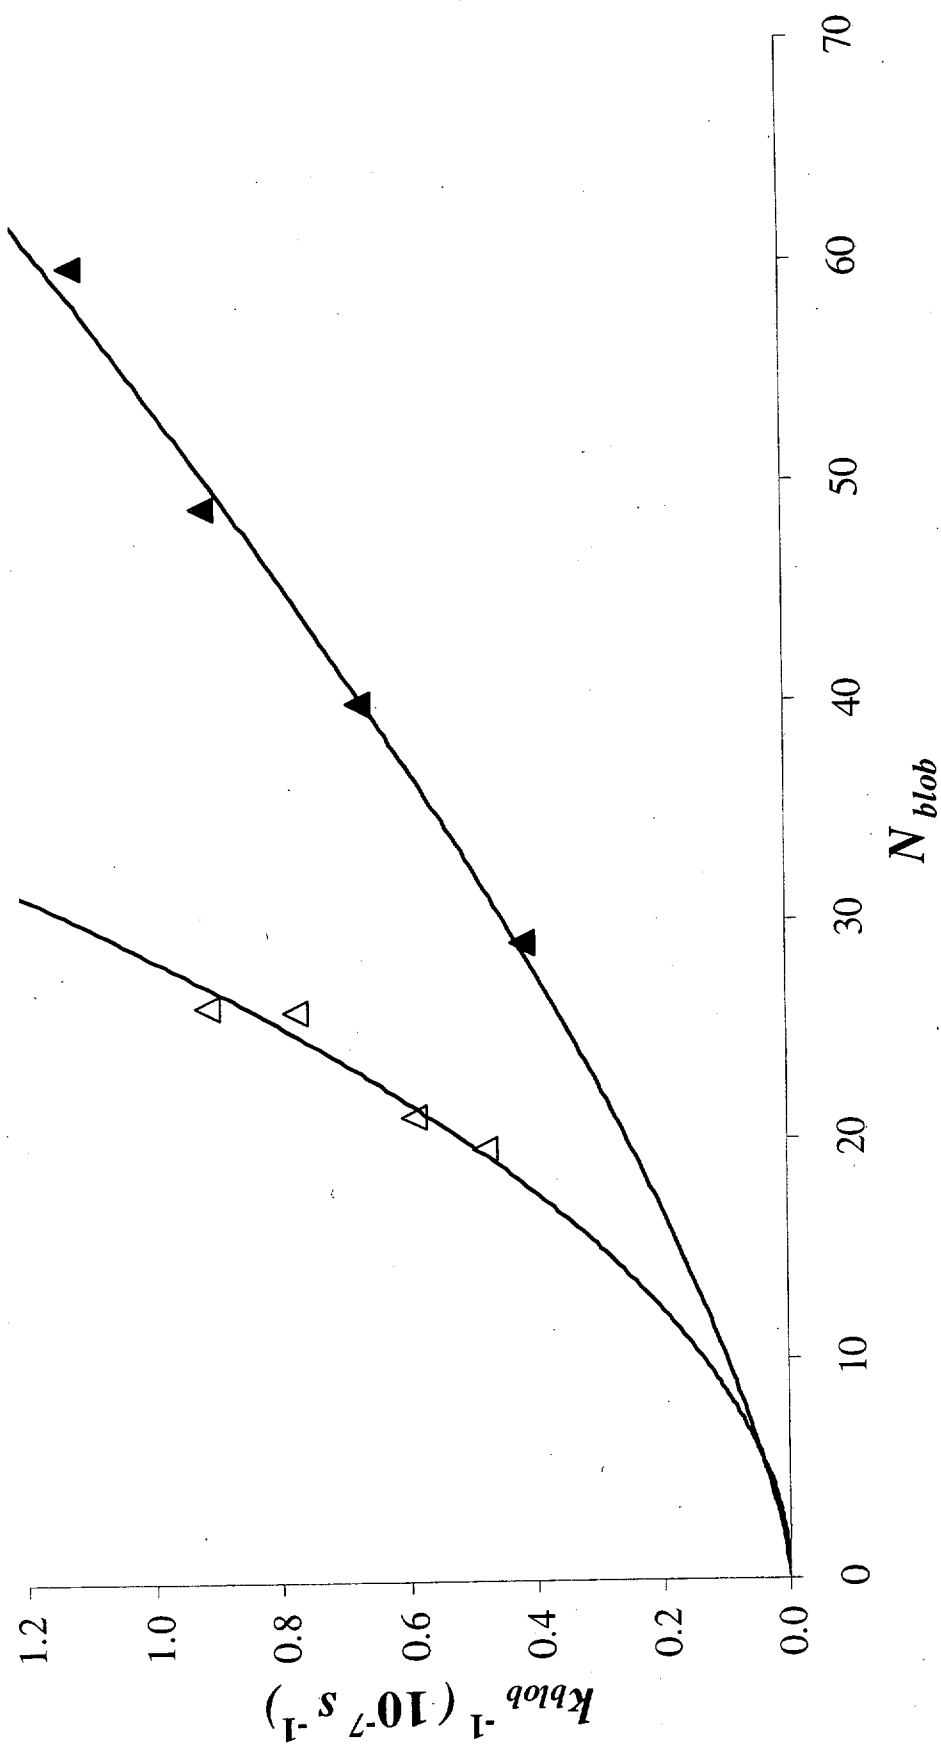

Power law plot of  $k_{blob}$  as a function of  $N_{blob}$  ( $\blacktriangle$  in acetone and  $\Delta$  in DMF).
